# Supplementary material for: Molecular profiling of hormone receptor-positive, HER2-negative breast cancers from patients treated with neoadjuvant endocrine therapy in the CARMINA 02 trial (UCBG-0609)
Source: PubMed Central journal article supplement (PMC6180434; doi:10.1186/s13045-018-0670-9), 2018-10-11

We investigated the molecular profiling of HR-positive, HER2-negative breast cancers patients treated with NET, and identified Th1-related immune system and lipid metabolism play roles and targeted NGS analysis revealed a high frequency of clinically relevant somatic mutations, particularly in PIK3CA/AKT/mTOR and the cell cycle and apoptosis pathway in endocrine-resistant tumors.

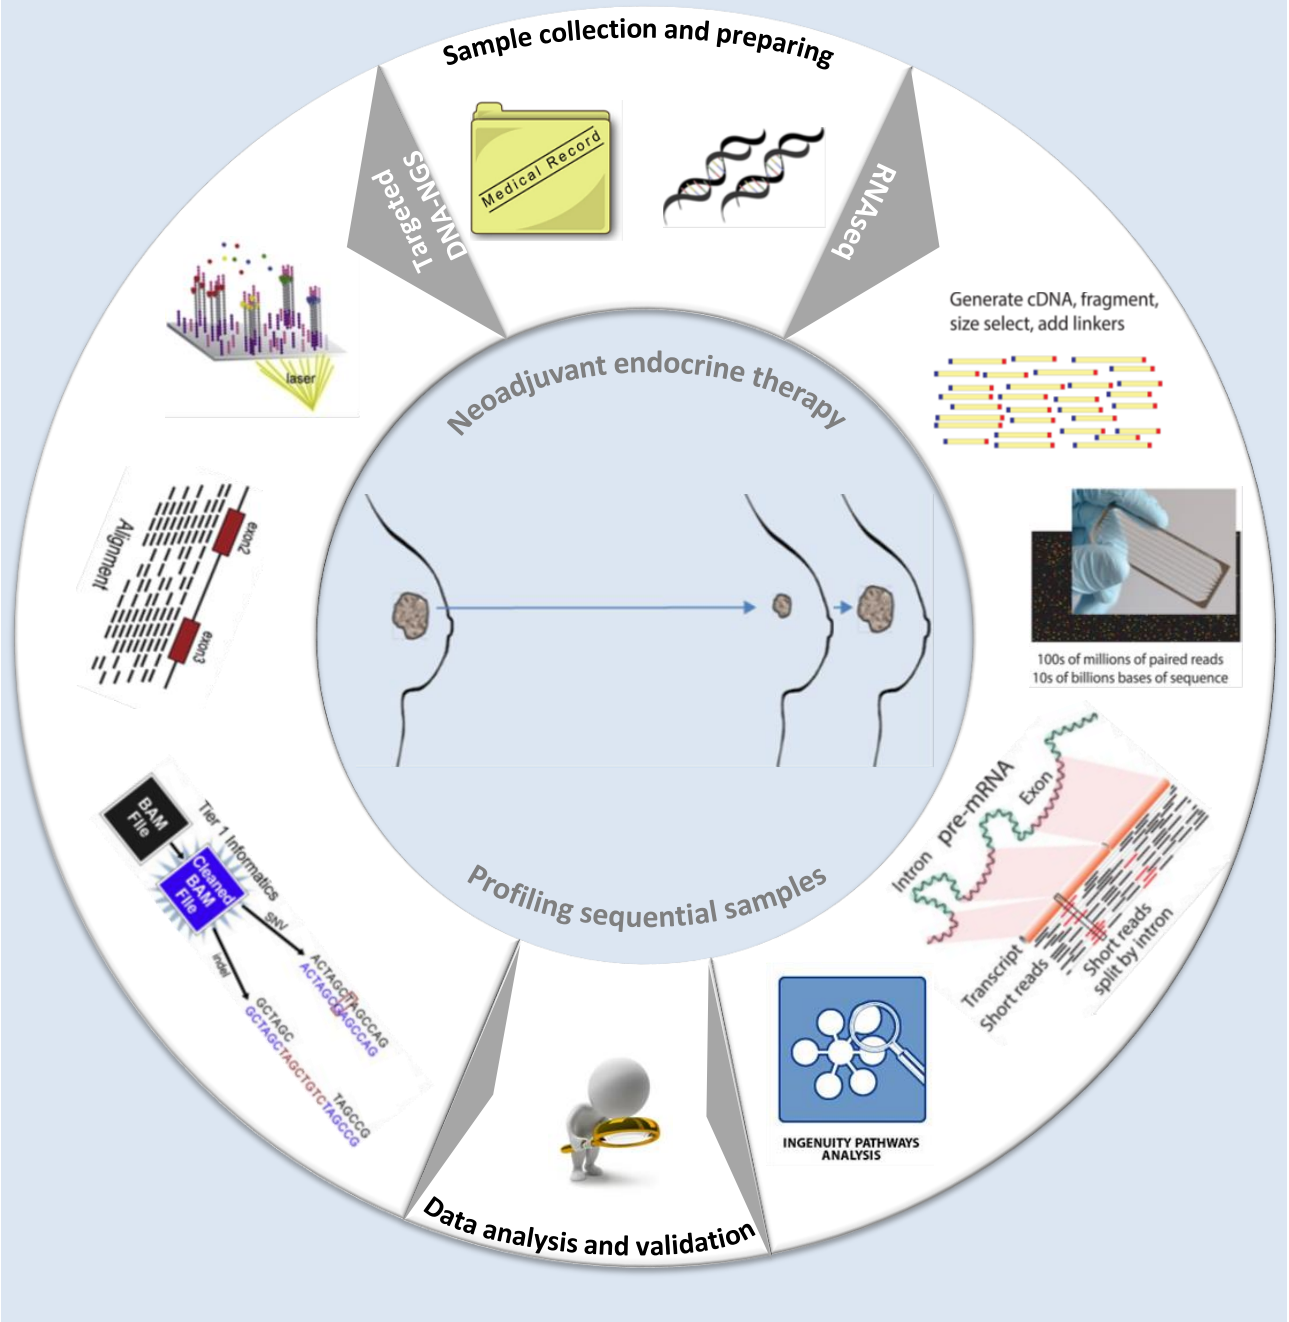

Supplement: 13045_2018_670_MOESM2_ESM.pdf [file 13045_2018_670_MOESM2_ESM.pdf]
