# Supplementary material for: Molecular profiling of hormone receptor-positive, HER2-negative breast cancers from patients treated with neoadjuvant endocrine therapy in the CARMINA 02 trial (UCBG-0609)
Source: PubMed Central journal article supplement (PMC6180434; doi:10.1186/s13045-018-0670-9), 2018-10-11

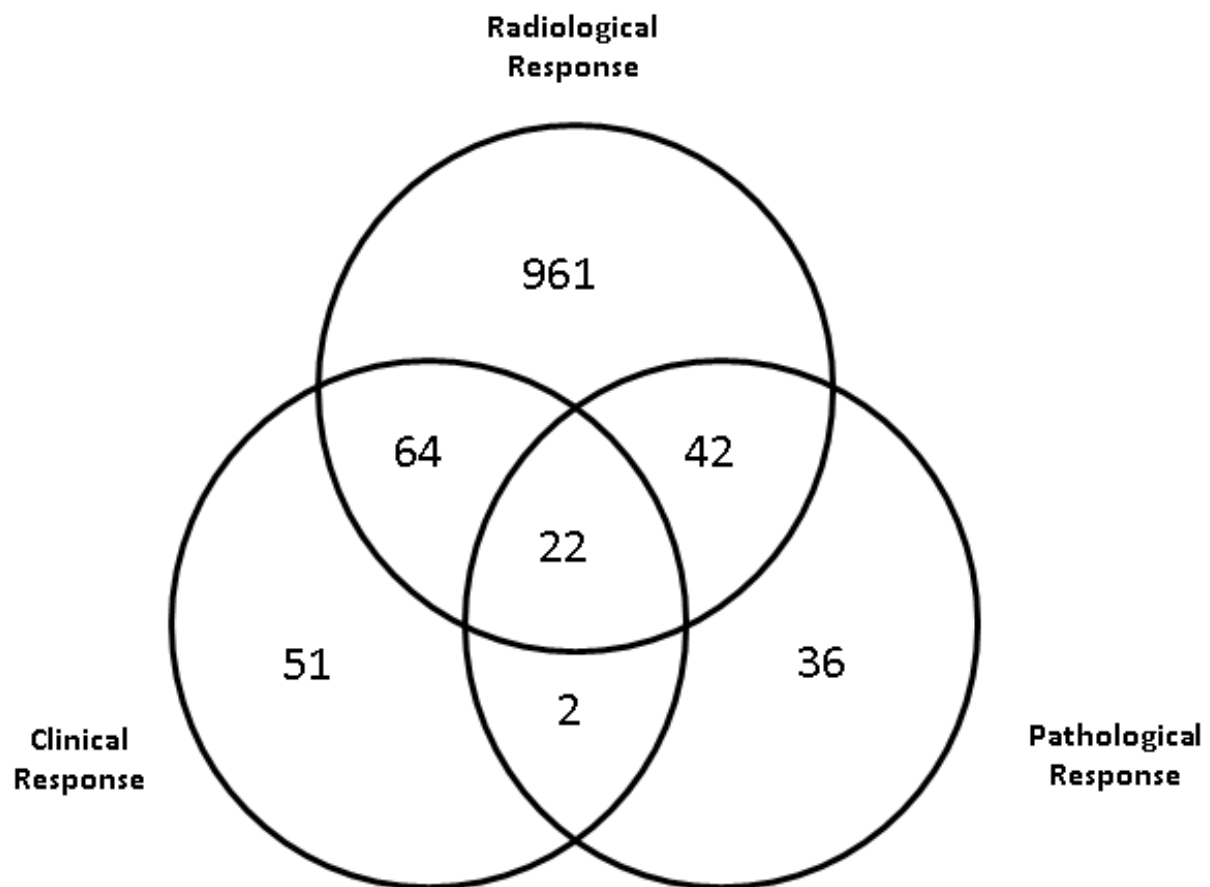

Supplement: 13045_2018_670_MOESM3_ESM.pdf [file 13045_2018_670_MOESM3_ESM.pdf]
